# Supplementary material for: Ciliary Hedgehog signaling patterns the digestive system to generate mechanical forces driving elongation
Source: PubMed Central journal article supplement (PMC8664829; doi:10.1038/s41467-021-27319-z), 2021-12-10
Supplement: 41467_2021_27319_MOESM1_ESM.pdf [file 41467_2021_27319_MOESM1_ESM.pdf]

**Supplementary Figure 1. CILK1 is essential for limb patterning, but does not affect intestinal diameter or the whole-body length. Related to Figure 1.**

- (A) Schematic representation of the murine *Cilk1* alleles in this study. The *Cilk1*<sup>-</sup> allele, also called *Cilk1*<sup>tm1a(KOMP)Mbp</sup>, is a "knockout first" allele that contains a cassette expressing *lacZ* gene and *neomycin resistance gene* (*neo*) inserted between exon 5 and exon 6 of *Cilk1*. Flp-mediated recombination removed the cassette between the FRT sites to generate the conditional allele, *Cilk1*<sup>lox</sup>. *Cilk1*<sup>lox</sup> possesses exon 6 flanked by loxP sites. Cre-mediated recombination removed exon 6 to generate a deletion allele, *Cilk1*<sup>Δ</sup>. FRT, Flippase recognition target; En2 SA, splice acceptor of mouse *Engrailed2* exon 2; IRES, an internal ribosome entry sequence, pA, polyadenylation signal (pA); hBactP, human *β-actin* promoter. Only exons 4-7 of the *Cilk1* gene are shown.
- (B) Photos of E15.5 *Cilk1*<sup>+/-</sup> and *Cilk1*<sup>-/-</sup> embryos. Arrowheads indicate edema, short limbs, and polydactyly. Scale bar, 1 mm.
- (C) Diameters of E13.5, E16.5 and E17.5 *Cilk1*<sup>+/+</sup> (n=3, 3 and 5), *Cilk1*<sup>+/-</sup> (n=8, 7 and 6) and *Cilk1*<sup>-/-</sup> (n=3, 3 and 3) proximal (stomach-intestine boundary) and distal (intestine-cecum junction) intestines.
- (D) The crown-rump lengths of E18.5 *Cilk1*<sup>+/+</sup> (n=4), *Cilk1*<sup>+/-</sup> (n=9) and *Cilk1*<sup>-/-</sup> (n=4) embryos.
- (E) Immunofluorescence staining of E13.5 intestinal cross sections from *Cilk1*<sup>+/-</sup> embryos for phospho-histone H3 (pHH3, red),  $\alpha$ -tubulin (green),  $\gamma$ -tubulin (white) and nuclei (Hoechst, blue). Below, higher magnifications of the indicated cell. Scale bar of larger images, 25  $\mu$ m. Scale bar of enlarged images, 1  $\mu$ m.
- (F) The number of pHH3-positive cells per section from E13.5 *Cilk1*<sup>+/-</sup> (n=3) and *Cilk1*<sup>-/-</sup> (n=3) intestines. For each embryonic intestine, the number of pHH3-positive cells was averaged from three stained sections. Values are presented as means  $\pm$  SD.
- (G) The percentage of EdU-positive cells in the whole esophagi, the epithelial cells and the mesenchymal cells in *Cilk1*<sup>+/-</sup> (n=3) and *Cilk1*<sup>-/-</sup> (n=3) embryos at E14.5. For each esophagus, we averaged the percentages from three sections.
- (C-D) and (F-G) Each point in the scatter plots represents the value from an individual embryo. Horizontal bars indicate means  $\pm$  SD. (C-D), ns,  $p > 0.05$  by ordinary one-way ANOVA test performed for each embryonic stage. (F), ns,  $p > 0.05$ ; \*\* $p < 0.01$  by two-sided unpaired t test. (G), \*\* $p < 0.01$  by ordinary one-way ANOVA Tukey's multiple comparisons test for each individual cell population.

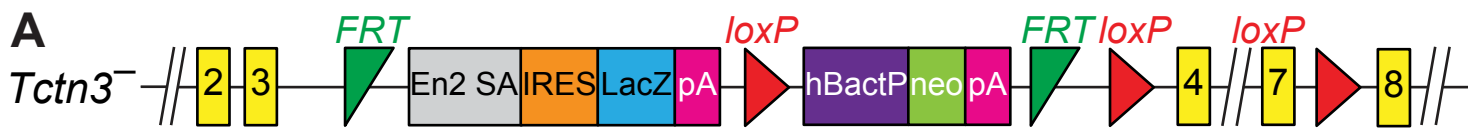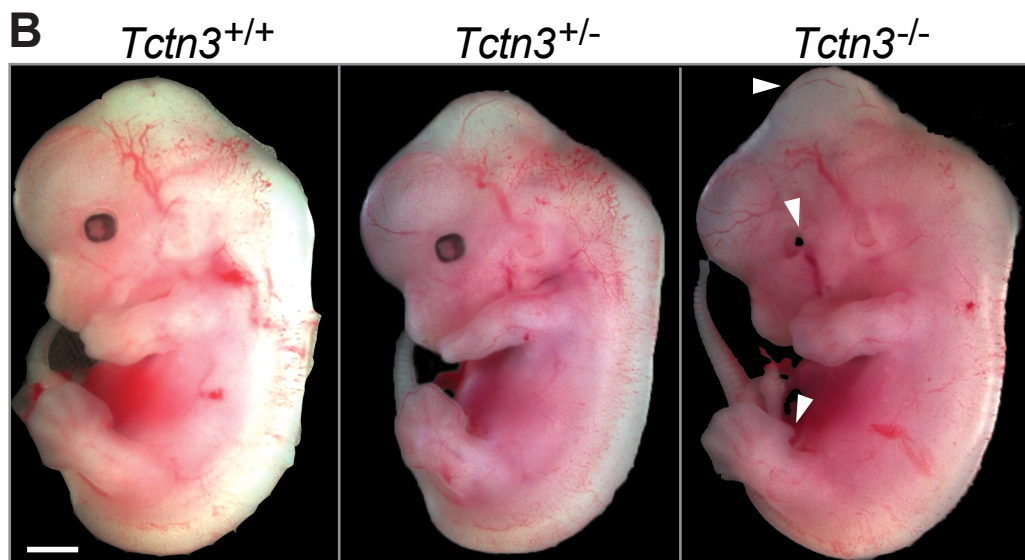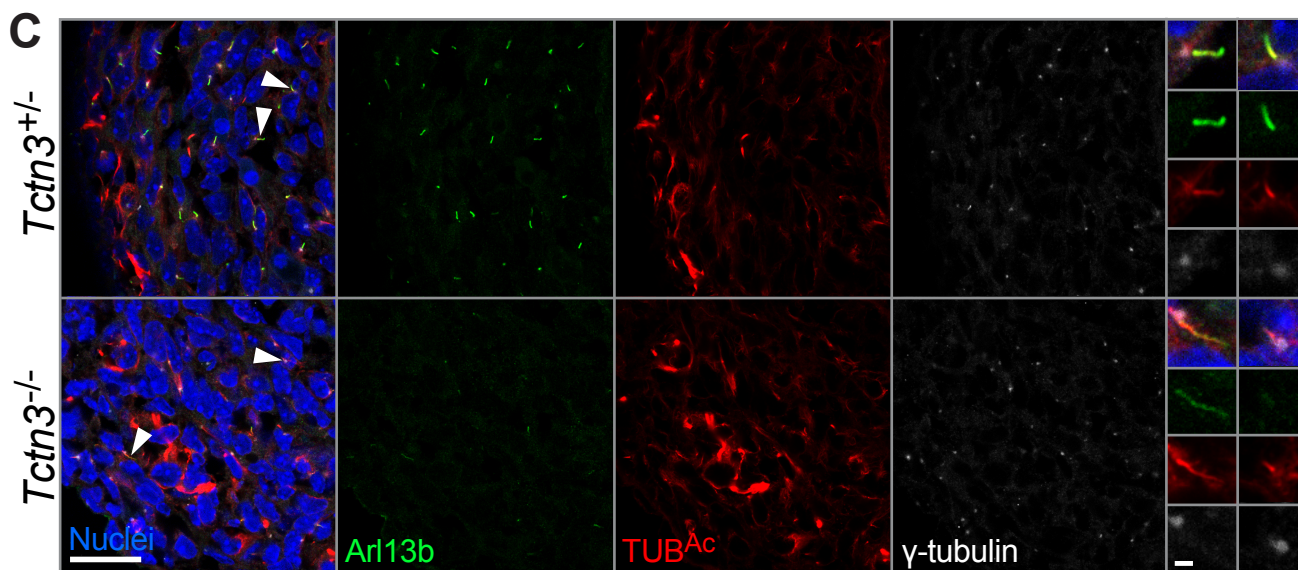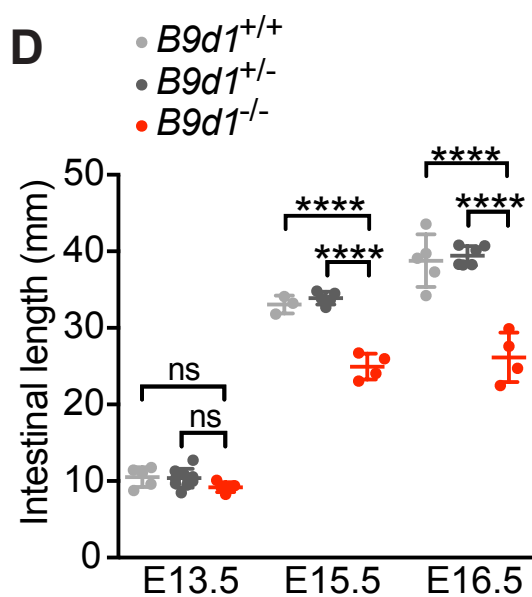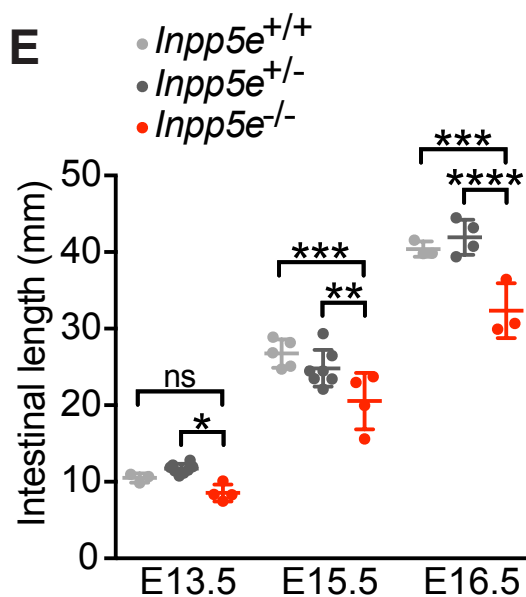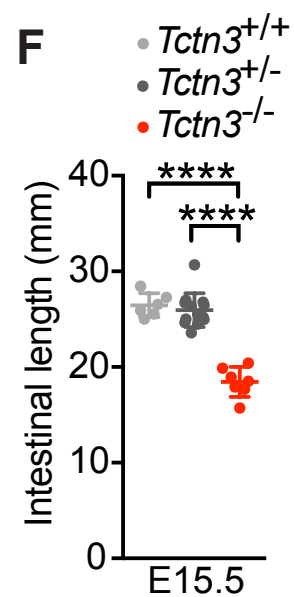

**Supplementary Figure 2. Disrupting cilia by different mechanisms causes shortened intestine. Related to Figure 1.**

- (A) Schematic representation of the murine *Tctn3* alleles in this study. The *Tctn3*<sup>-</sup> allele, also called *Tctn3*<sup>tm47188(L1L2\_Bact\_P)</sup>, contains a cassette expressing *lacZ* gene and *neomycin resistance gene* (neo) inserted between exon 3 and exon 4. FRT, flippase recognition target; En2 SA, splice acceptor of mouse *Engrailed2* exon 2; IRES, an internal ribosome entry sequence, pA, polyadenylation (pA); hBactP, human  $\beta$ -actin promoter. Only exons 2-8 of the *Tctn3* gene are shown.
- (B) Photos of E13.5 wild type (*Tctn3*<sup>+/+</sup>), *Tctn3*<sup>+/-</sup> and *Tctn3*<sup>-/-</sup> embryos. Arrowheads indicate hydrocephalus, microphthalmia and polydactyly. Scale bar, 1 mm.
- (C) Immunofluorescence staining for ciliary membrane (ARL13B, green), ciliary axonemes (TUB<sup>Ac</sup>, red), basal bodies ( $\gamma$ -tubulin, white) and nuclei (Hoechst, blue), in intestines of *Tctn3*<sup>+/-</sup> and *Tctn3*<sup>-/-</sup> embryos at E13.5. Scale bar, 25  $\mu$ m. Scale bar for magnifications of the indicated cilia (right), 1  $\mu$ m.
- (D) Lengths of the small intestines of *B9d1*<sup>+/+</sup> (n=5, 3, and 5), *B9d1*<sup>+/-</sup> (n=9, 5, and 6) and *B9d1*<sup>-/-</sup> (n=5, 4, and 4) embryos at E13.5, 15.5 and 16.5.
- (E) Lengths of the small intestines of *Inpp5e*<sup>+/+</sup> (n=3, 5, and 3), *Inpp5e*<sup>+/-</sup> (n=8, 7, and 4) and *Inpp5e*<sup>-/-</sup> (n=4, 4, and 3) embryos at E13.5, 15.5 and 16.5.
- (F) Lengths of the small intestines of *Tctn3*<sup>+/+</sup> (n=6), *Tctn3*<sup>+/-</sup> (n=13) and *Tctn3*<sup>-/-</sup> (n=7) embryos at E15.5.
- (D), (E) and (F), each point represents the intestinal or esophageal length of one embryo. Horizontal bars indicate means  $\pm$  SD. ns, p > 0.05; \*p < 0.05; \*\*p < 0.01; \*\*\* p < 0.001; \*\*\*\* p < 0.0001 by one-way ANOVA Tukey's multiple comparisons test performed for each embryonic stage.

**A****E18.5**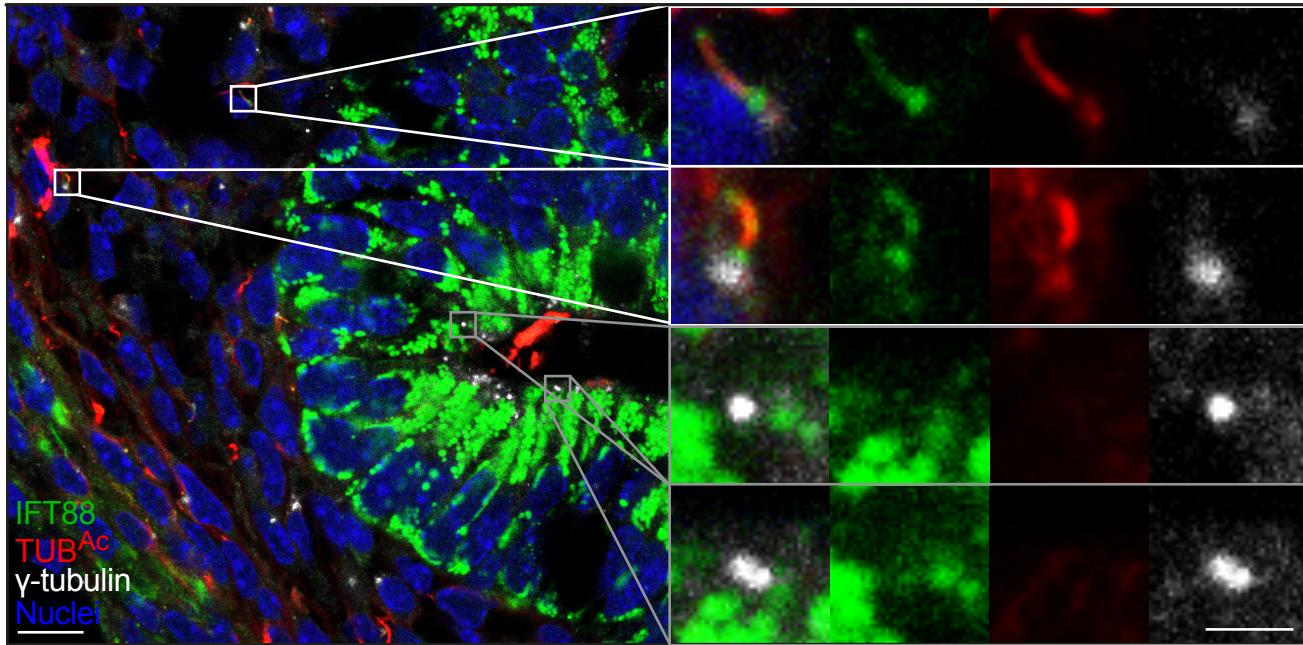**B**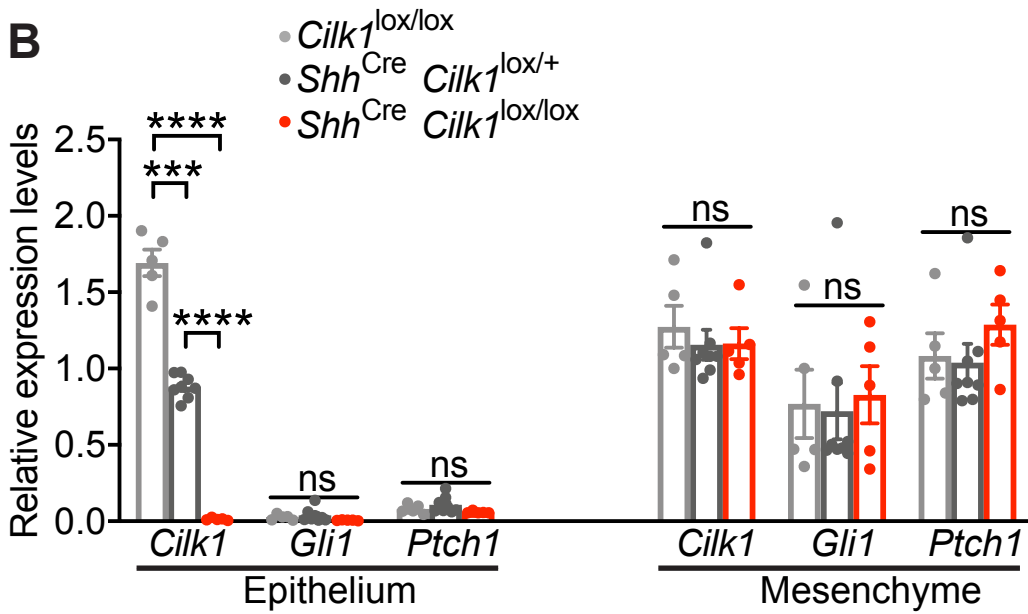**C**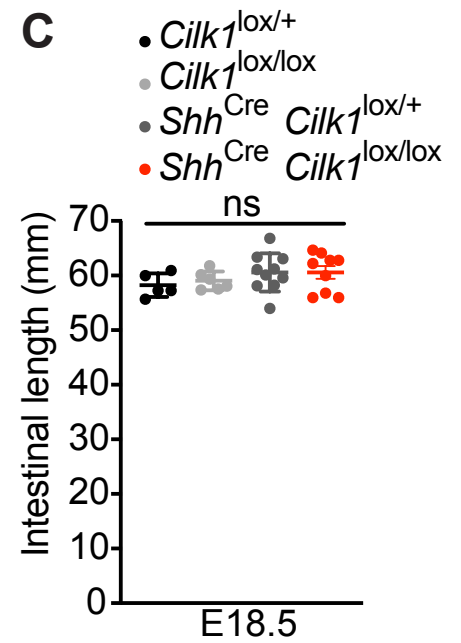

**Supplementary Figure 3. Epithelial CILK1 is dispensable for expression of HH target genes and intestinal elongation. Related to Figure 1.**

- (A) Intestinal mesenchymal cells, but not epithelial cells, possess cilia at E18.5. Immunofluorescence staining for IFT88 (green), ciliary axonemes (TUB<sup>Ac</sup>, red), basal bodies ( $\gamma$ -tubulin, white) and nuclei (Hoechst, blue) in E18.5 intestines. Scale bar, 10  $\mu$ m. White boxes denote mesenchymal cilia. Grey boxes denote epithelial centrosomes. Scale bar for magnifications, 2  $\mu$ m.
- (B) Relative levels of *Cilk1*, *Gli1* and *Ptch1* mRNA in E18.5 intestines of control (*Cilk1*<sup>lox/lox</sup>, n=5 and *Shh*<sup>Cre</sup> *Cilk1*<sup>lox/+</sup>, n=8) and *Shh*<sup>Cre</sup> *Cilk1*<sup>lox/lox</sup> (n=5) embryos. Values are presented as means  $\pm$  SEM. ns, p > 0.05; \*\*\* p < 0.001; \*\*\*\* p < 0.0001 by one-way ANOVA Tukey's multiple comparisons test.
- (C) Lengths of the small intestines in E18.5 control (*Cilk1*<sup>lox/+</sup>, n=5, *Cilk1*<sup>lox/lox</sup>, n=6 and *Shh*<sup>Cre</sup> *Cilk1*<sup>lox/+</sup>, n=10) and *Shh*<sup>Cre</sup> *Cilk1*<sup>lox/lox</sup> (n=9) embryos. Each point in the scatter plots represents the value from an individual embryo. Horizontal bars indicate means  $\pm$  SEM. ns, p > 0.05 by ordinary one-way ANOVA test.

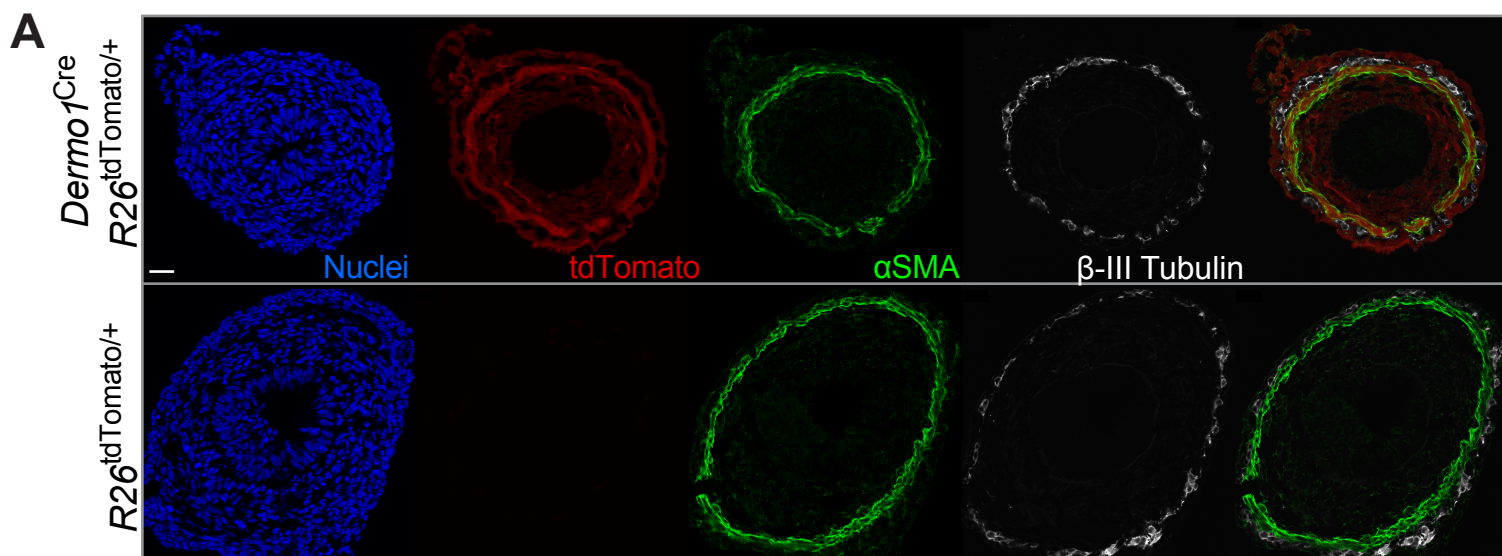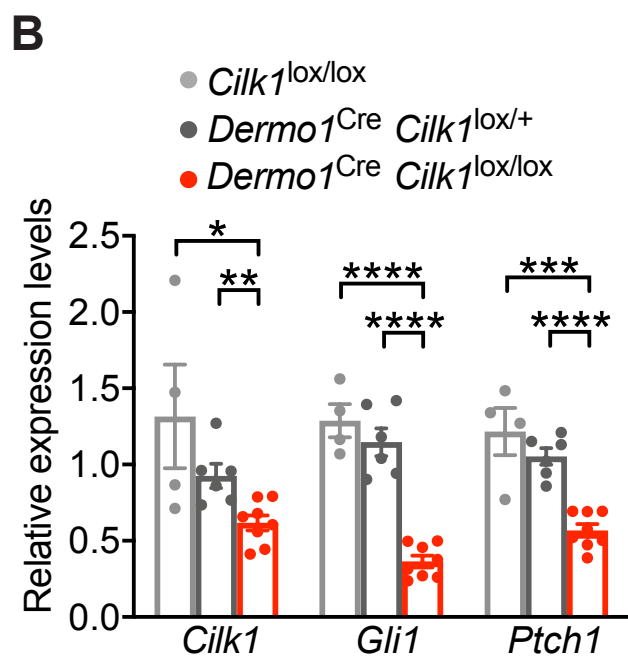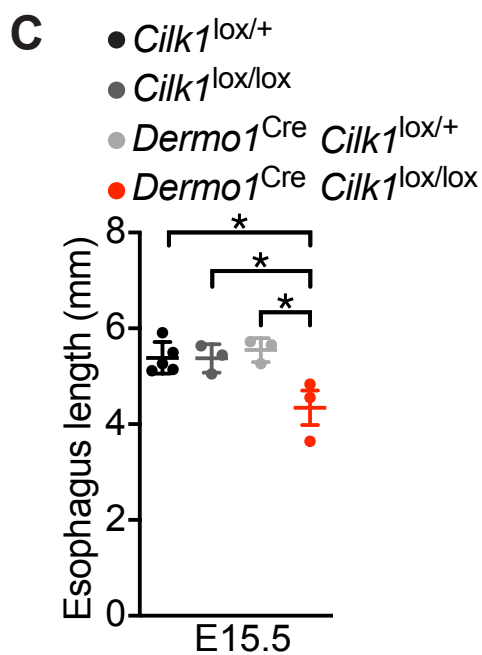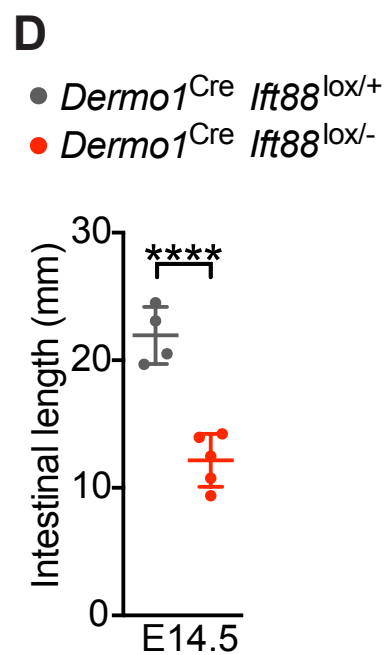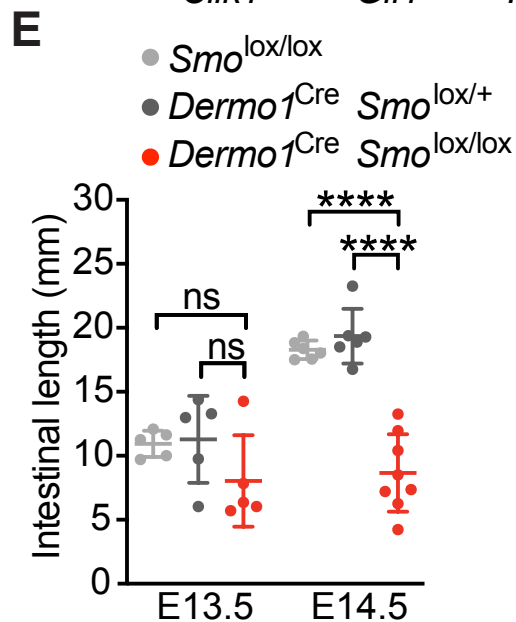

**Supplementary Figure 4. Mesenchymal cilia mediate HH signaling responsiveness and elongation of tubular organs. Related to Figure 1.**

- (A) *Dermo1<sup>Cre</sup>* mediates efficient recombination in the intestinal mesenchyme. Immunofluorescence staining of *Dermo1<sup>Cre</sup> R26<sup>tdTomato/+</sup>* and *R26<sup>tdTomato/+</sup>* intestine at E13.5 for recombined cells (tdTomato, red), smooth muscle ( $\alpha$ SMA, green), enteric nervous system ( $\beta$ -III Tubulin, white) and nuclei (Hoechst, blue). Scale bar, 25  $\mu$ m. The endoderm-derived epithelial cells and the ectoderm-derived enteric nervous system cells do not express tdTomato. In contrast, mesoderm-derived mesenchymal cells, including the  $\alpha$ SMA cells, express tdTomato.
- (B) Relative levels of *Cilk1*, *Gli1* and *Ptch1* mRNA in E15.5 control (*Cilk1<sup>lox/lox</sup>*, n=4 and *Dermo1<sup>Cre</sup> Cilk1<sup>lox/+</sup>*, n=6) and *Dermo1<sup>Cre</sup> Cilk1<sup>lox/lox</sup>* (n=8) intestines. Values are presented as means  $\pm$  SEM.  $p < 0.0001$  by two-way ANOVA test with genotype as a source of variation.
- (C) Lengths of E15.5 control (*Cilk1<sup>lox/+</sup>* n=5, *Cilk1<sup>lox/lox</sup>* n=3 and *Dermo1<sup>Cre</sup> Cilk1<sup>lox/+</sup>* n=3) and *Dermo1<sup>Cre</sup> Cilk1<sup>lox/lox</sup>* (n=3) esophagi.
- (D) Lengths of E14.5 *Dermo1<sup>Cre</sup> Ift88<sup>lox/+</sup>* (n=4) and *Dermo1<sup>Cre</sup> Ift88<sup>lox/-</sup>* (n=5) small intestines.
- (E) Lengths of E13.5 and E14.5 control (*Smo<sup>lox/lox</sup>*, n=5 at E13.5, n=6 at E14.5; *Dermo1<sup>Cre</sup> Smo<sup>lox/+</sup>* n=5 and 6) and *Dermo1<sup>Cre</sup> Smo<sup>lox/lox</sup>* (n=5 and 8) small intestines. Each point in the scatter plots represents the value from an individual embryo. Horizontal bars indicate means  $\pm$  SD. ns,  $p > 0.05$ ; \*\*\*\*  $p < 0.0001$  by one-way ANOVA Tukey's multiple comparisons test performed for each embryonic stage.
- (B-D), \* $p < 0.05$ ; \*\* $p < 0.01$  and \*\*\*\* $p < 0.0001$  by two-sided unpaired t test.



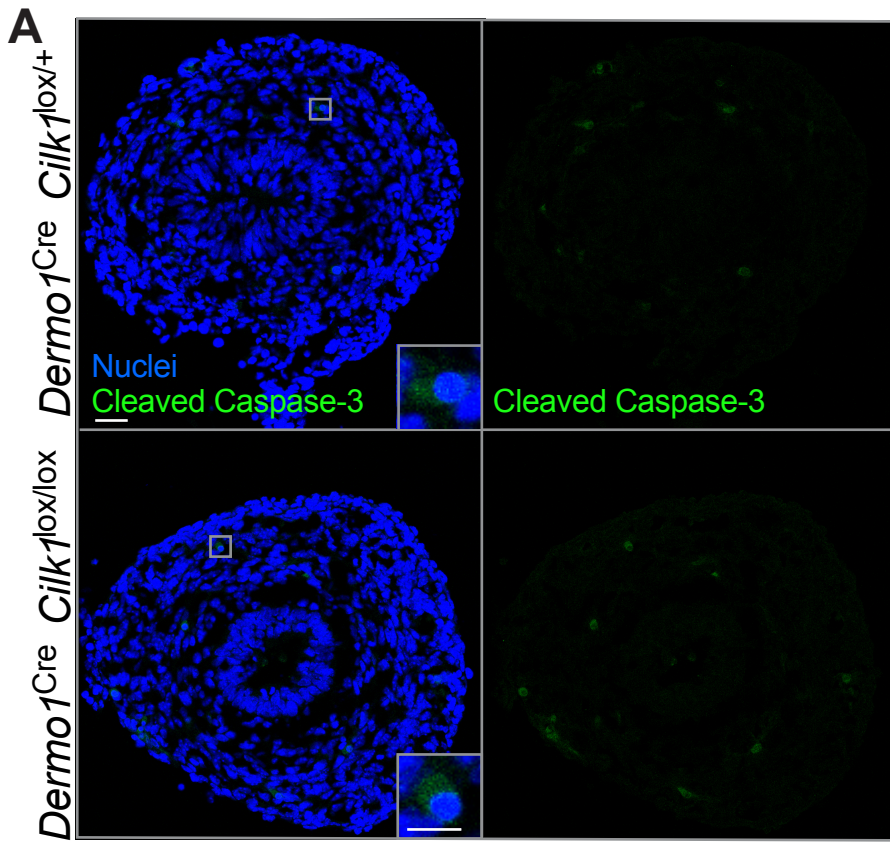

**B**

- *Dermo1<sup>Cre</sup> Ick<sup>lox/+</sup>*
- *Dermo1<sup>Cre</sup> Ick<sup>lox/lox</sup>*

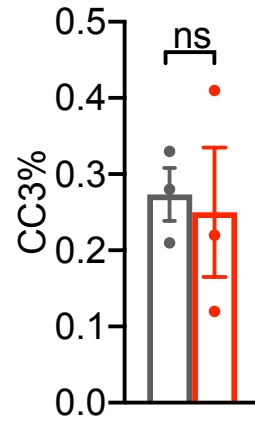

**Supplementary Figure 5. Mesenchymal CILK1 does not affect apoptosis. Related to Figure 1.**

- (A) Immunofluorescence staining of Cleaved Caspase-3 (green) in E13.5 control *Dermo1<sup>Cre</sup> Cilk1<sup>lox/+</sup>* and *Dermo1<sup>Cre</sup> Cilk1<sup>lox/lox</sup>* intestines. Scale bar, 25  $\mu\text{m}$ . Magnifications of the boxed region shown with a scale bar of 10  $\mu\text{m}$ .
- (B) The percentage of cleaved caspase 3-positive (CC3) cells per section of E13.5 *Dermo1<sup>Cre</sup> Cilk1<sup>lox/+</sup>* (n=3) and *Dermo1<sup>Cre</sup> Cilk1<sup>lox/lox</sup>* (n=3) intestines. For each embryonic intestine, the percentage of CC3-positive cells was averaged from three stained sections. Values are presented as means  $\pm$  SEM. ns,  $p > 0.05$  by two-sided unpaired t test.

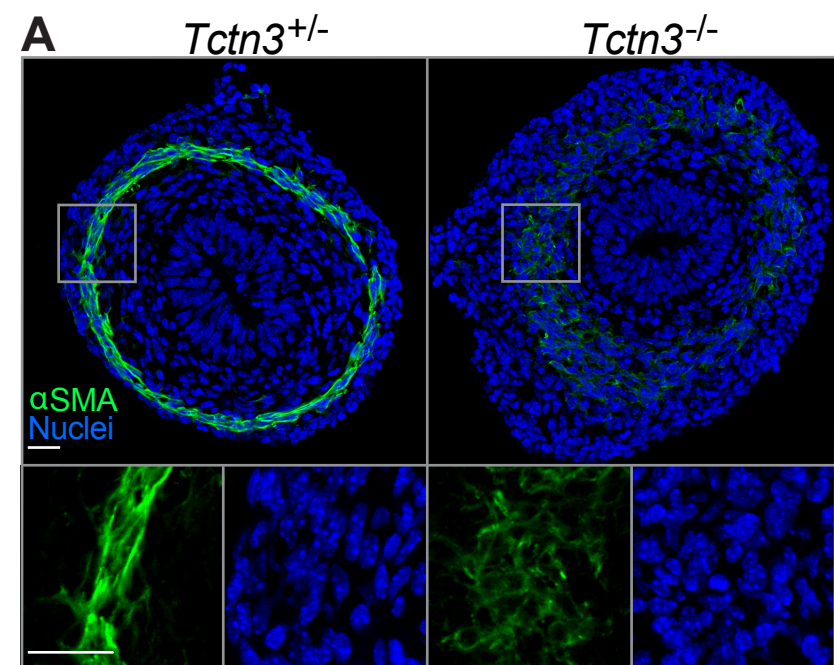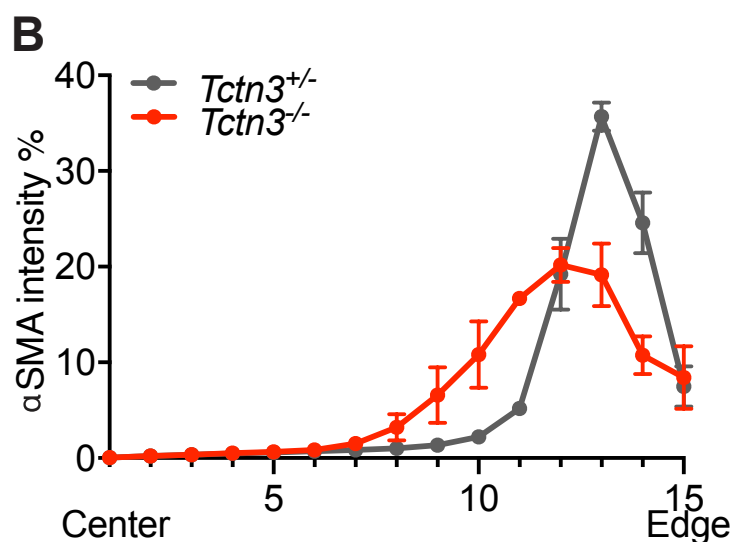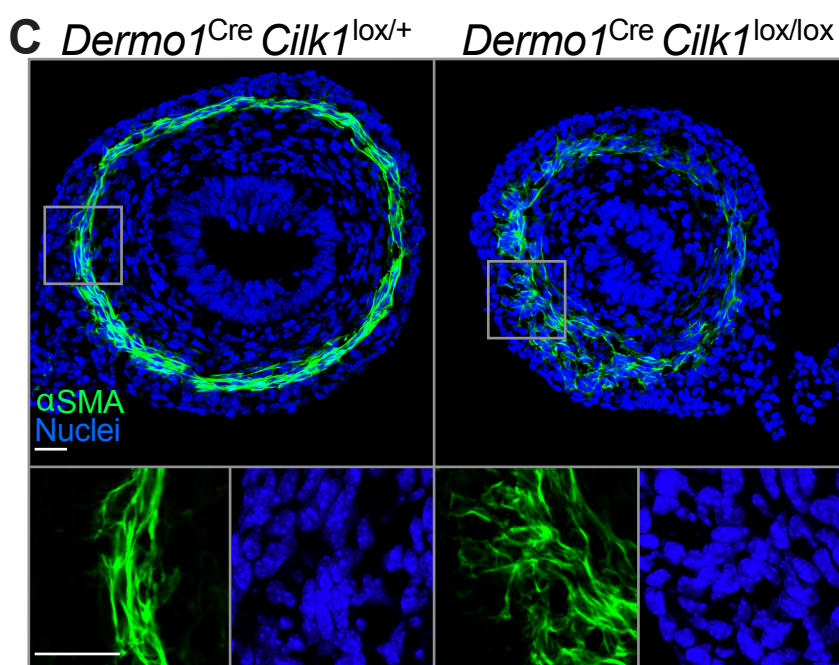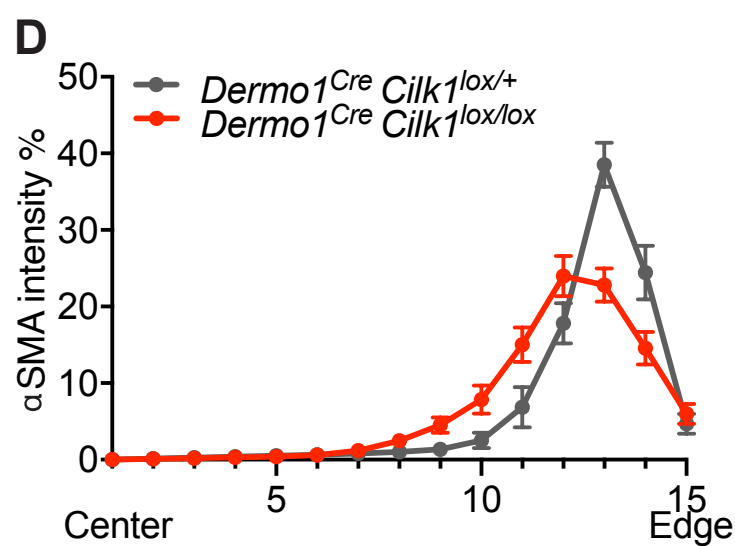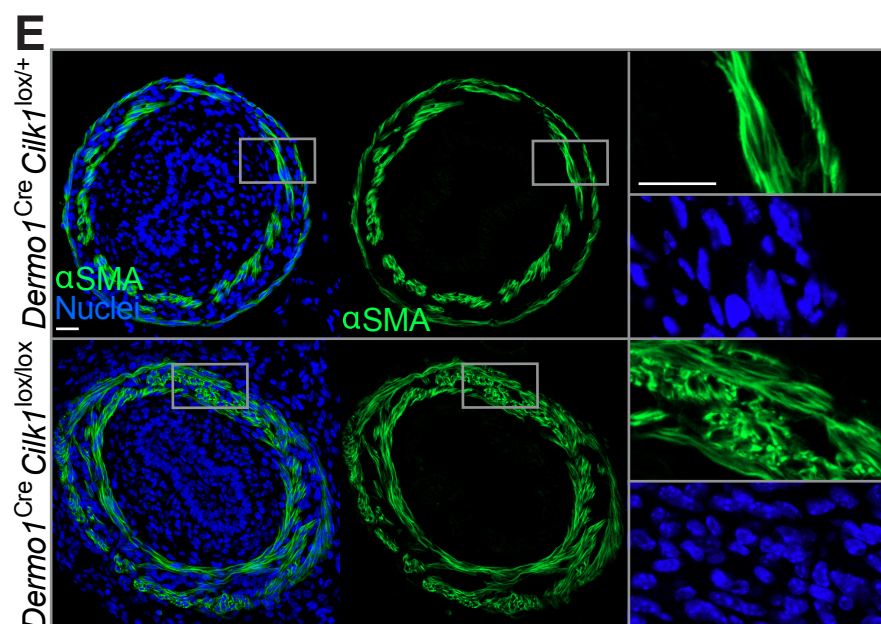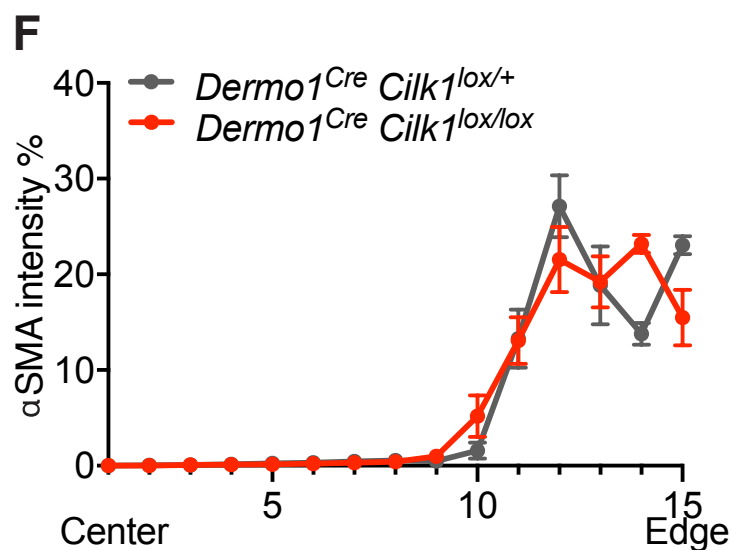

**Supplementary Figure 6. TCTN3 and mesenchymal CILK1 are required for the organization of circumferential smooth muscle. Related to Figure 2.**

- (A) Immunofluorescence staining for smooth muscle ( $\alpha$ SMA, green) and nuclei (Hoechst, blue) in E13.5 *Tctn3*<sup>+/-</sup> and *Tctn3*<sup>-/-</sup> intestines. Below, higher magnifications of boxed regions. Scale bars, 25  $\mu$ m.
  - (B) The radial distribution of  $\alpha$ SMA relative staining intensity from the center of the section to the outer section edge of E13.5 *Tctn3*<sup>+/-</sup> (n=3) and *Tctn3*<sup>-/-</sup> (n=3) intestines, subdivided 15 ring bins.
  - (C) Immunofluorescences staining for smooth muscle ( $\alpha$ SMA, green) and nuclei (Hoechst, blue) in E13.5 *Dermo1*<sup>Cre</sup> *Cilk1*<sup>lox/+</sup> and *Dermo1*<sup>Cre</sup> *Cilk1*<sup>lox/lox</sup> intestines. Right, higher magnifications of boxed regions. Scale bars, 25  $\mu$ m.
  - (D) The radial distribution of  $\alpha$ SMA relative staining intensity from the center of the section to the outer section edge of E13.5 *Dermo1*<sup>Cre</sup> *Cilk1*<sup>lox/+</sup> (n=3) and *Dermo1*<sup>Cre</sup> *Cilk1*<sup>lox/lox</sup> (n=4) intestines, subdivided into 15 ring bins.
  - (E) Immunofluorescence staining of E15.5 *Dermo1*<sup>Cre</sup> *Cilk1*<sup>lox/+</sup> and *Dermo1*<sup>Cre</sup> *Cilk1*<sup>lox/lox</sup> esophagi for smooth muscle ( $\alpha$ SMA, green) and nuclei (Hoechst, blue).
  - (F) The radial distribution of  $\alpha$ SMA relative staining intensity from the center of the section to the outer section edge of E15.5 *Dermo1*<sup>Cre</sup> *Cilk1*<sup>lox/+</sup> (n=3) and *Dermo1*<sup>Cre</sup> *Cilk1*<sup>lox/lox</sup> (n=3) esophagi, subdivided into 15 ring bins.
- (B), (D) and (F), the  $\alpha$ SMA intensity fraction in each bin was averaged from 3-4 sections. Values are presented as means  $\pm$  SEM. X axis, bin number.

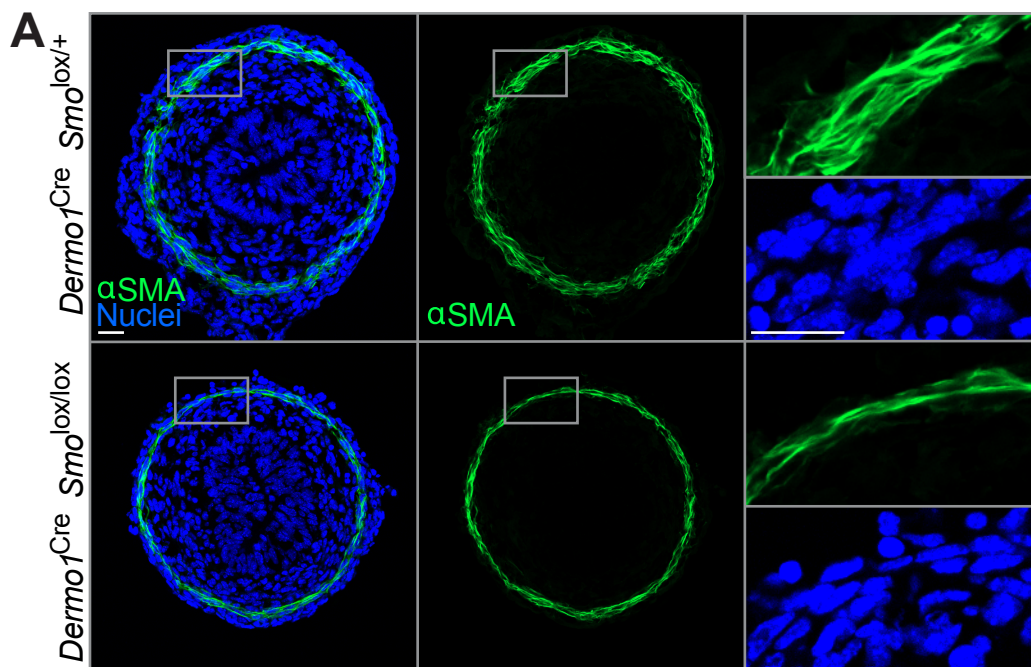

**B**

- $Dermo1^{Cre} Smo^{lox/+}$
- $Dermo1^{Cre} Smo^{lox/lox}$

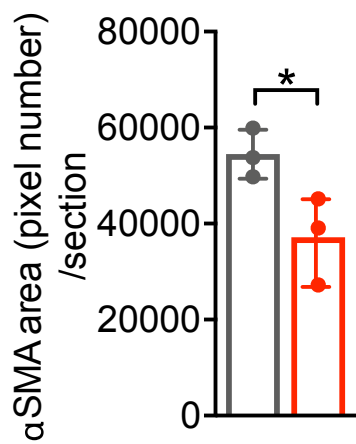

**C**

- $Dermo1^{Cre} Smo^{lox/+}$
- $Dermo1^{Cre} Smo^{lox/lox}$

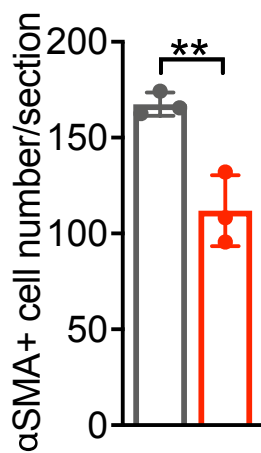

**Supplementary Figure 7. SMO acts in the mesenchyme to promote the formation of the circumferential smooth muscle. Related to Figure 2.**

- (A) Immunofluorescence staining for smooth muscle ( $\alpha$ SMA, green) and nuclei (Hoechst, blue) in E13.5 *Dermo1<sup>Cre</sup> Smo<sup>lox/+</sup>* and *Dermo1<sup>Cre</sup> Smo<sup>lox/lox</sup>* intestines. Right, higher magnifications of boxed regions. Scale bars, 25  $\mu$ m.
- (B) The area of  $\alpha$ SMA staining per section from E13.5 *Dermo1<sup>Cre</sup> Smo<sup>lox/+</sup>* (n=3) and *Dermo1<sup>Cre</sup> Smo<sup>lox/lox</sup>* (n=3) intestines. For each embryonic intestine, the  $\alpha$ SMA area (pixel number) was averaged from 5-8 sections.
- (C) The number of  $\alpha$ SMA-positive cells per section from E13.5 control (*Dermo1<sup>Cre</sup> Smo<sup>lox/+</sup>*, n=3) and *Dermo1<sup>Cre</sup> Smo<sup>lox/lox</sup>* (n=3) intestines. For each intestine, the number of  $\alpha$ SMA-positive cells was averaged from 5-8 sections.
- (B-C) Values are presented as means  $\pm$  SD. \*  $p < 0.05$ ; \*\* $p < 0.01$  by two-sided unpaired t test.

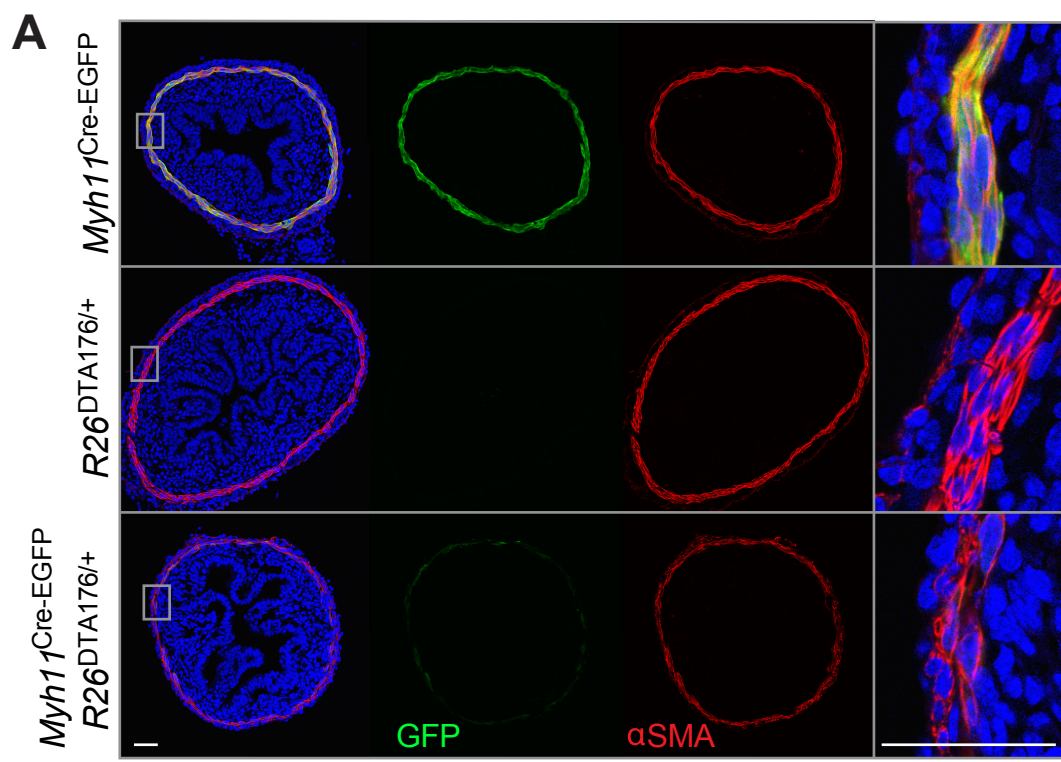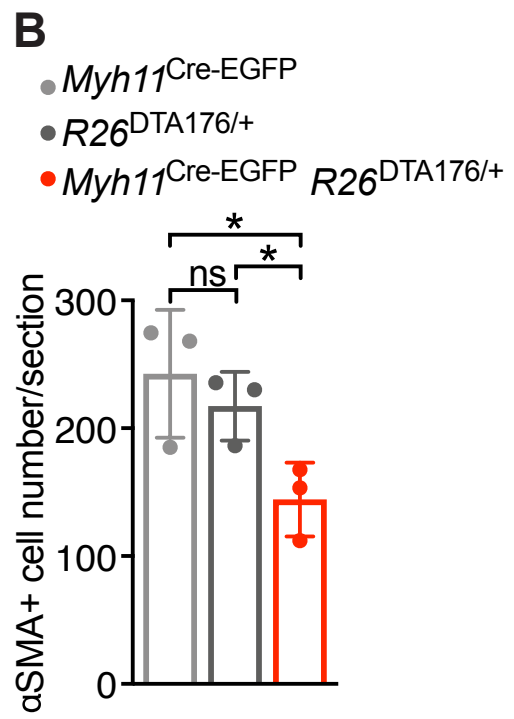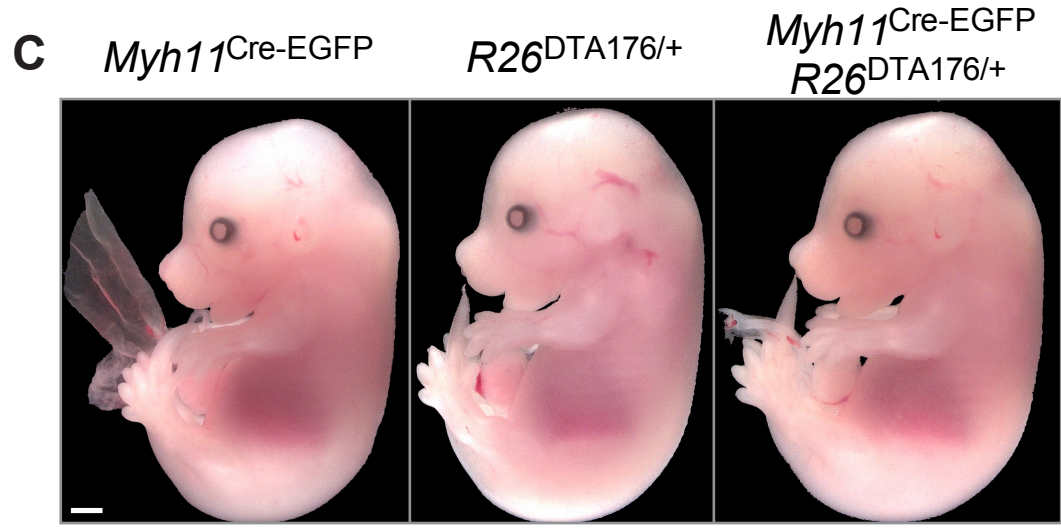

**Supplementary Figure 8. Partially ablating smooth muscle cells does not grossly disrupt embryogenesis. Related to Figure 3.**

- (A) Immunofluorescence staining of E15.5 control (*Myh11*<sup>Cre-EGFP</sup> and *R26*<sup>DTA176/+</sup>) and *Myh11*<sup>Cre-EGFP</sup> *R26*<sup>DTA176/+</sup> intestines for GFP (green), smooth muscle ( $\alpha$ SMA, red) and nuclei (Hoechst, blue). Magnifications of the boxed region shown at right. Scale bars, 50  $\mu$ m.
- (B) The number of  $\alpha$ SMA-positive cells per E15.5 control (*Myh11*<sup>Cre-EGFP</sup>, n=3 and *R26*<sup>DTA176/+</sup>, n=3) and *Myh11*<sup>Cre-EGFP</sup> *R26*<sup>DTA176/+</sup> (n=3) intestinal section. For each intestine, the number of  $\alpha$ SMA-positive cells was averaged from 2-4 sections. Values are presented as means  $\pm$  SD. The p value by ordinary one-way ANOVA is 0.0398. ns p > 0.05, \* p < 0.05 by two-sided unpaired t test.
- (C) Photos of E15.5 control (*Myh11*<sup>Cre-EGFP</sup> and *R26*<sup>DTA176/+</sup>) and *Myh11*<sup>Cre-EGFP</sup> *R26*<sup>DTA176/+</sup> embryos. Scale bar, 1 mm.



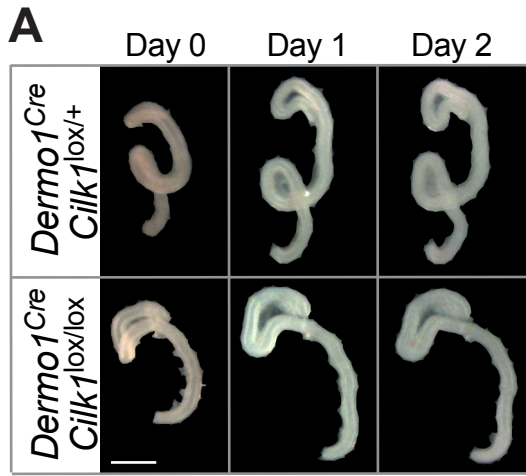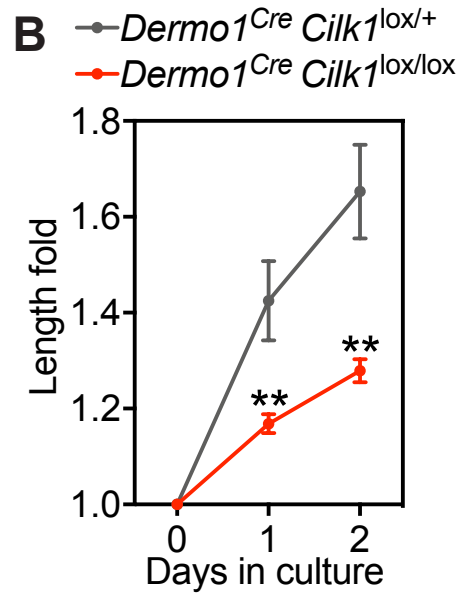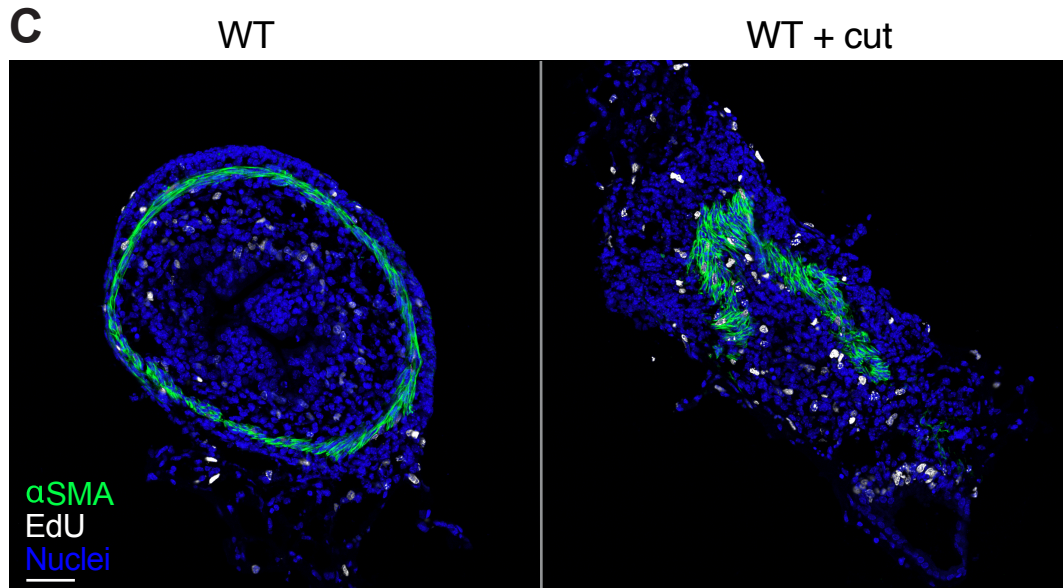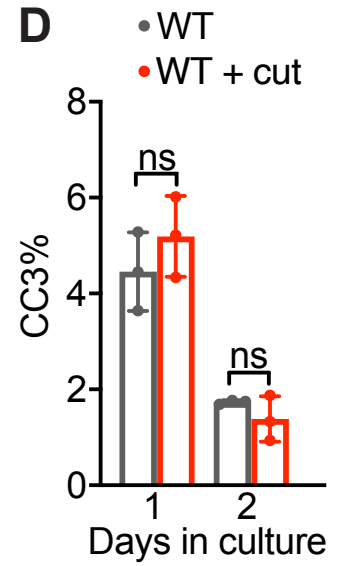

**Supplementary Figure 9. An *in vitro* system supporting intestinal elongation recapitulates dependency on CILK1. Related to Figure 3.**

- (A) Representative E13.5 intestines of indicated genotypes before (Day 0) and after culture for indicated numbers of days. Scale bar, 1 mm.
- (B) Length fold change of the cultured intestines (*Dermo1<sup>Cre</sup> Cilk1<sup>lox/+</sup>*; n=5; *Dermo1<sup>Cre</sup> Cilk1<sup>lox/lox</sup>*; n=5) for indicated numbers of days. The values are presented as means  $\pm$  SD. \*\* p < 0.01 by two-way ANOVA Sidak's multiple comparisons test.
- (C) Immunofluorescence staining for EdU (white), smooth muscle ( $\alpha$ SMA, green) and nuclei (Hoechst, blue) of E13.5 wild-type (WT) intestinal segments incised longitudinally (cut) or not after culture in Matrigel for three days. Scale bar, 50  $\mu$ m.
- (D) The percentage of cleaved Caspase-3-positive cells in WT (n=3) and WT + cut (n=3) intestinal segments after culture for one or two days. For each segment, we averaged the percentages from three sections. Values are presented as means  $\pm$  SD. ns, p > 0.05 by two-way ANOVA Sidak's multiple comparisons test (adjusted P values are 0.0051 for day 1 and 0.0020 for day 2).

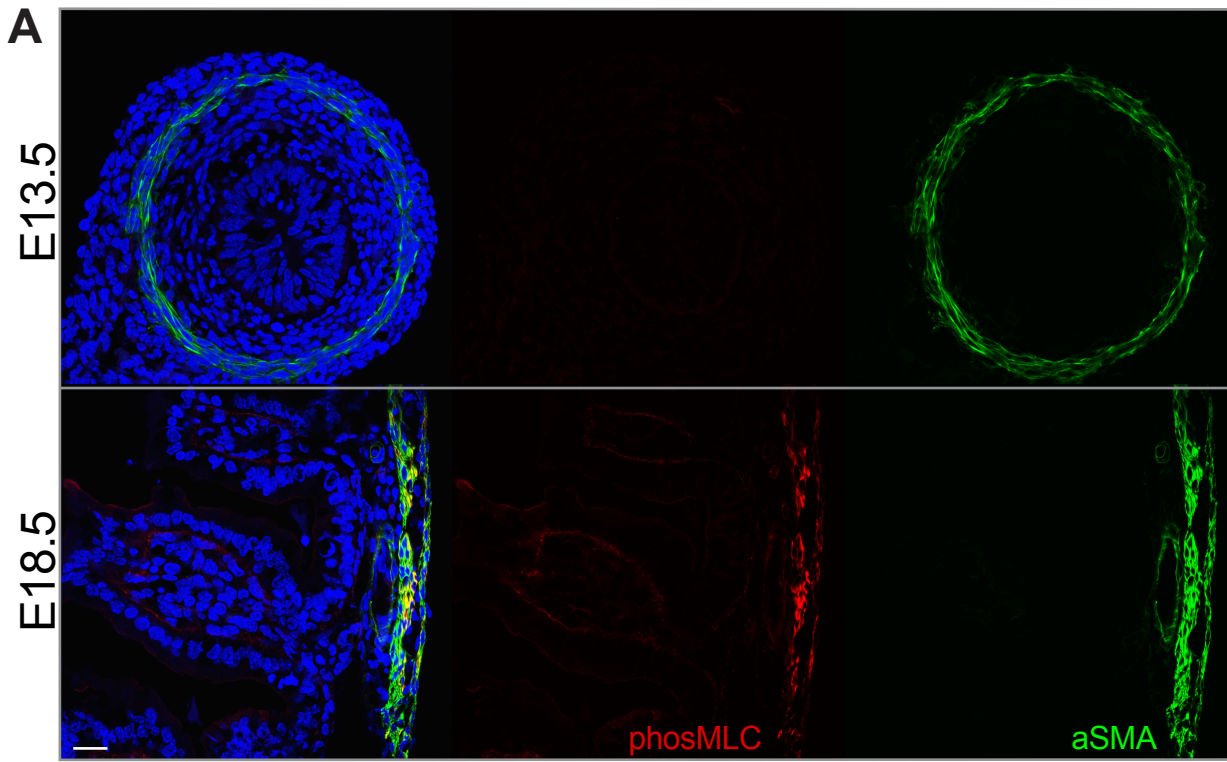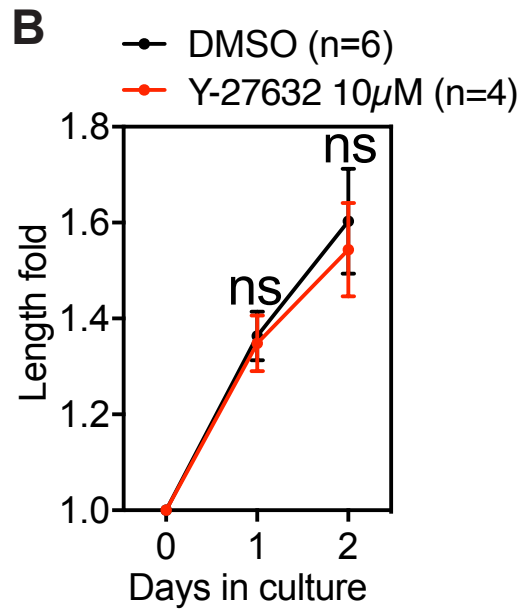

**Supplementary Figure 10. Limited contributions of smooth muscle contractility to intestinal elongation. Related to Figure 3.**

- (A) Immunofluorescence staining of E13.5 and E18.5 wild-type intestines for phospho-MLC (red), smooth muscle ( $\alpha$ SMA, green) and nuclei (Hoechst, blue). Scale bar, 25  $\mu$ m.
- (B) Length fold change of the cultured intestines dissected from E13.5 treated with DMSO (n=6) or ROCK inhibitor Y-27632 (n=4) for indicated days. The values are presented as means  $\pm$  SD. ns  $p > 0.05$  by two-way ANOVA Sidak's multiple comparisons test.

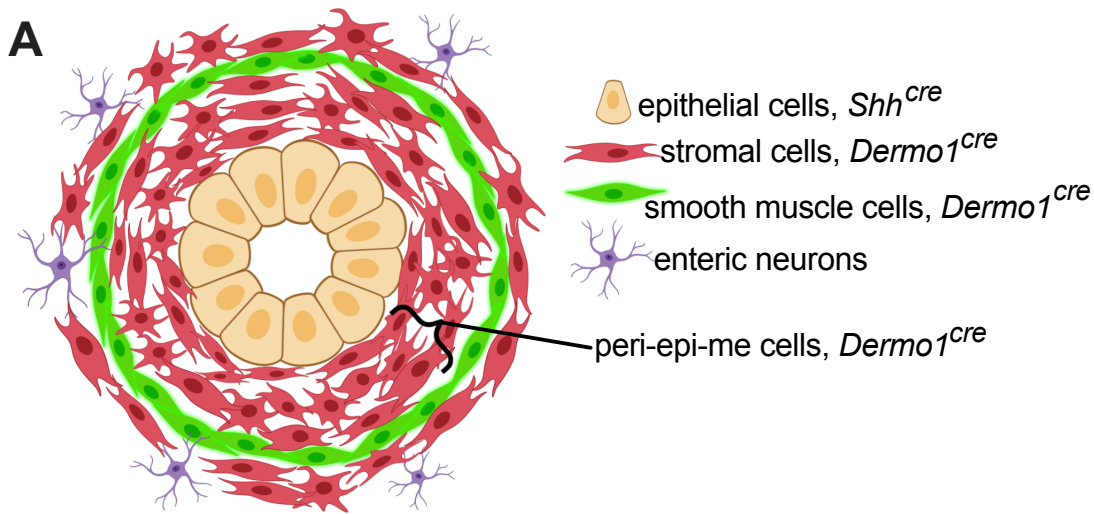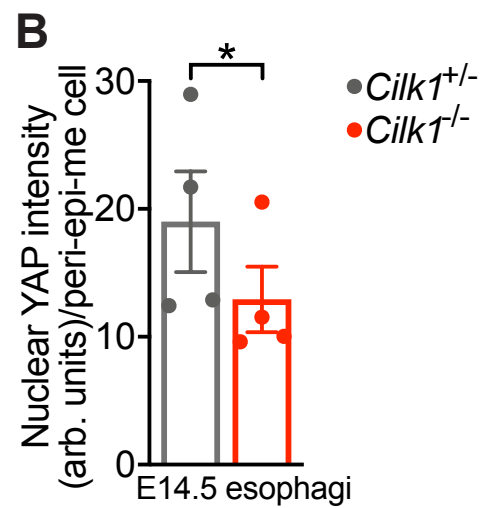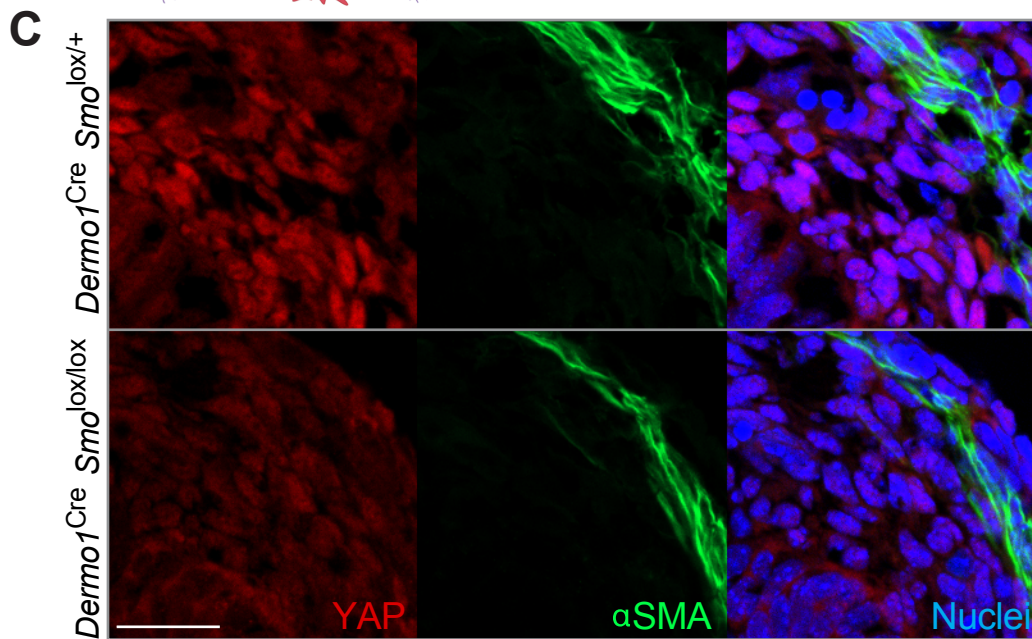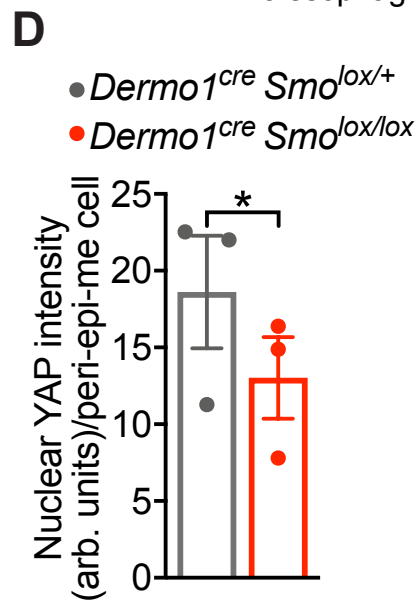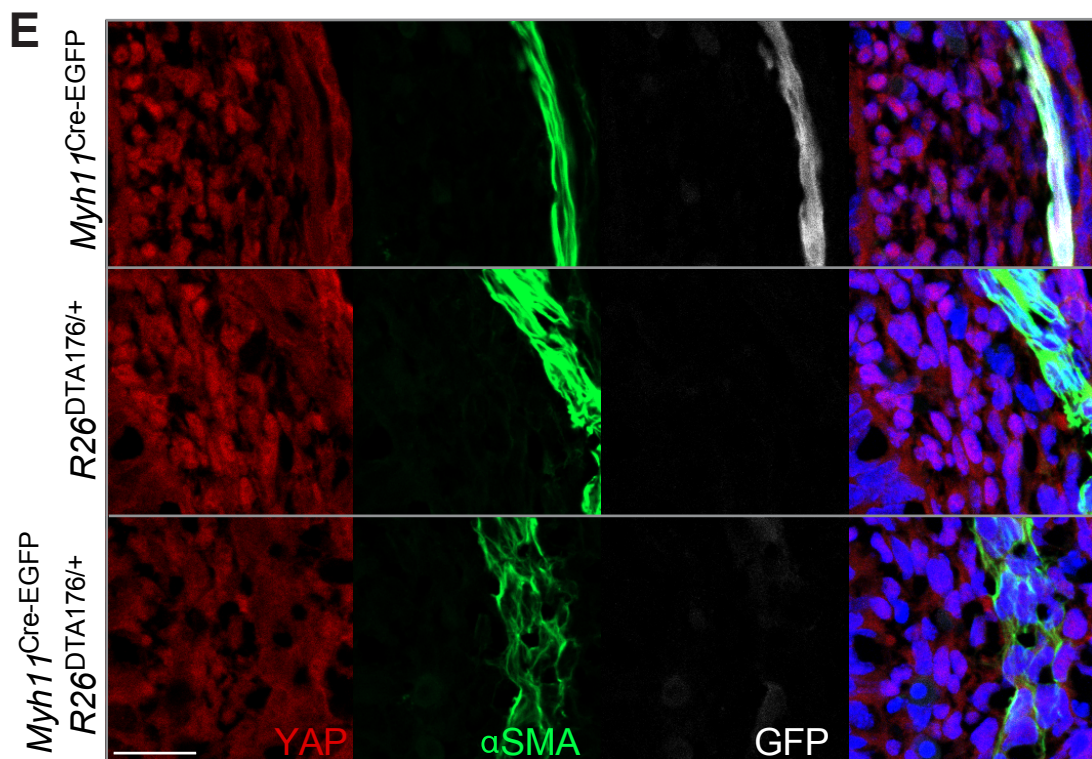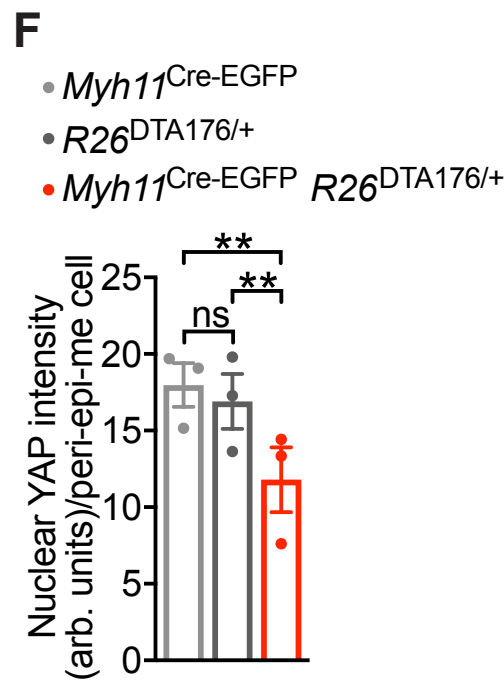

**Supplementary Figure 11. YAP levels depend on smooth muscle integrity. Related to Figure 4.**

- (A) Different cell types in the E13.5 intestine section. *Shh<sup>Cre</sup>* mediates recombination in endoderm-derived epithelial cells and *Dermo1<sup>Cre</sup>* drives recombination in mesoderm-derived mesenchymal cells, including the  $\alpha$ SMA-positive smooth muscle cells. Neither *Shh<sup>Cre</sup>* nor *Dermo1<sup>Cre</sup>* is active in the ectoderm-derived enteric neural cells. The inner mesenchymal cells between the epithelium and the smooth muscle (peri-epi-me cells) have higher levels of nuclear YAP.
- (B) Nuclear YAP intensities of peri-epithelial mesenchymal cells in E14.5 *Cilk1<sup>+/-</sup>* (n=4) and *Cilk1<sup>-/-</sup>* (n=4) esophagi.
- (C) Immunofluorescence staining for YAP (red), smooth muscle ( $\alpha$ SMA, green) and nuclei (Hoechst, blue) in E13.5 *Dermo1<sup>Cre</sup> Smo<sup>lox/+</sup>* and *Dermo1<sup>Cre</sup> Smo<sup>lox/lox</sup>* intestines. Scale bar, 25  $\mu$ m.
- (D) Nuclear YAP intensities of peri-epithelial mesenchymal cells in E13.5 *Dermo1<sup>Cre</sup> Smo<sup>lox/+</sup>* (n=3) and *Dermo1<sup>Cre</sup> Smo<sup>lox/lox</sup>* (n=3) intestines.
- (E) Immunofluorescence staining for YAP (red), smooth muscle ( $\alpha$ SMA, green) and nuclei (Hoechst, blue) in E14.5 control (*Myh11<sup>Cre</sup>-EGFP* and *R26<sup>DTA176/+</sup>*) and *Myh11<sup>Cre</sup>-EGFP R26<sup>DTA176/+</sup>* intestines. Scale bar, 25  $\mu$ m.
- (F) Nuclear YAP intensities of peri-epithelial mesenchymal cells in E14.5 *Myh11<sup>Cre</sup>-EGFP* (n=3) and *R26<sup>DTA176/+</sup>* (n=3) and *Myh11<sup>Cre</sup>-EGFP R26<sup>DTA176/+</sup>* (n=3) intestines.
- (B), (D) and (F), for each esophagus or intestine, the nuclear YAP intensity per cell was averaged from 3-4 sections. Values are presented as means  $\pm$  SEM. (B) and (D), \*  $p < 0.05$  by two-sided paired t test. (F), ns,  $p > 0.05$  and \*\* $p < 0.01$  by one-way ANOVA Sidak's multiple comparisons test.

**A** *Dermo1<sup>Cre</sup> YAP<sup>lox/+</sup> TAZ<sup>lox/+</sup>*      *Dermo1<sup>Cre</sup> YAP<sup>lox/lox</sup> TAZ<sup>lox/+</sup>*

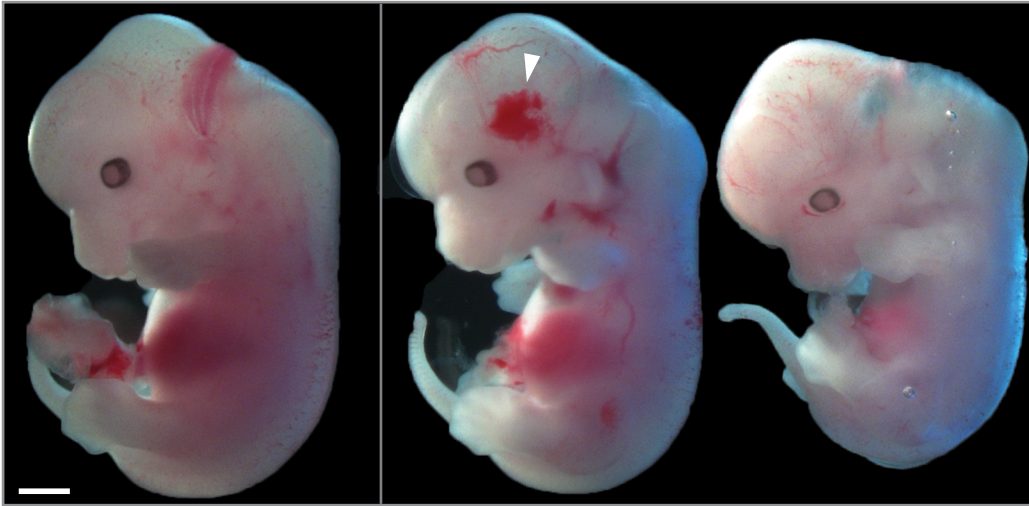

**B** *Yap<sup>lox/lox</sup> Taz<sup>lox/+</sup>*      *Dermo1<sup>Cre</sup> Yap<sup>lox/lox</sup> Taz<sup>lox/+</sup>*

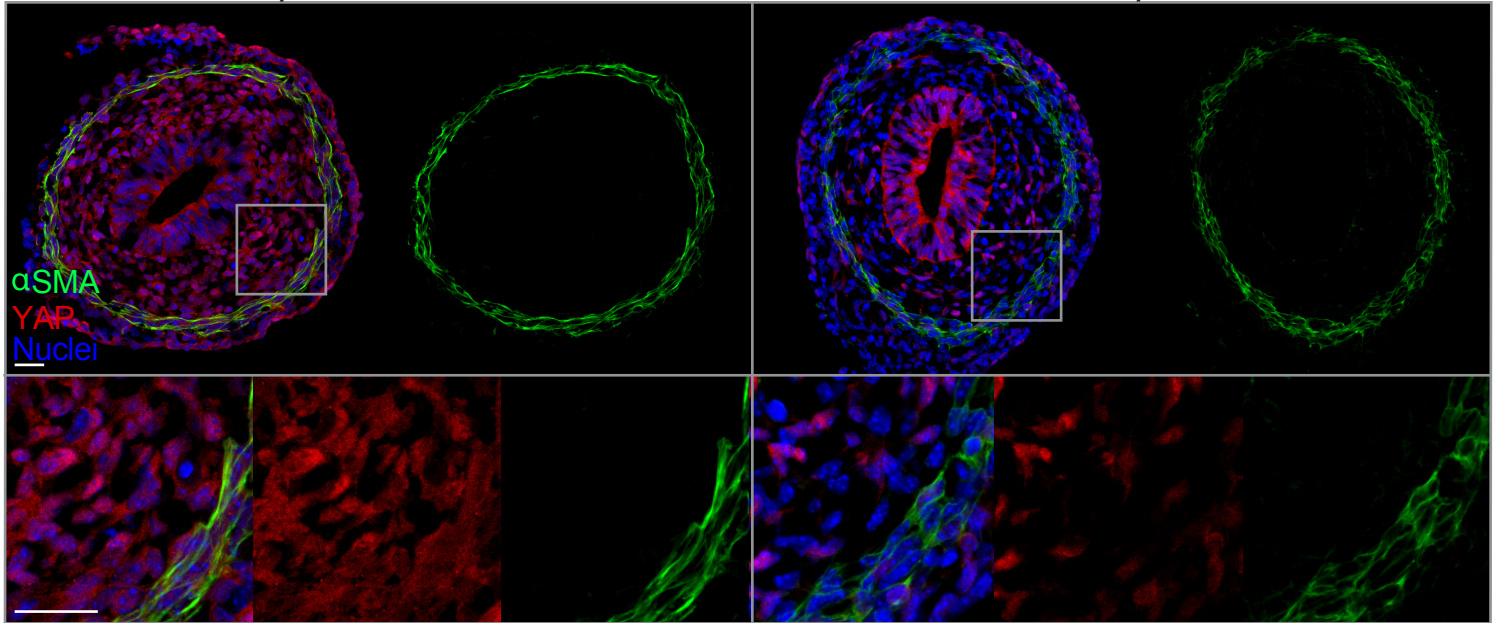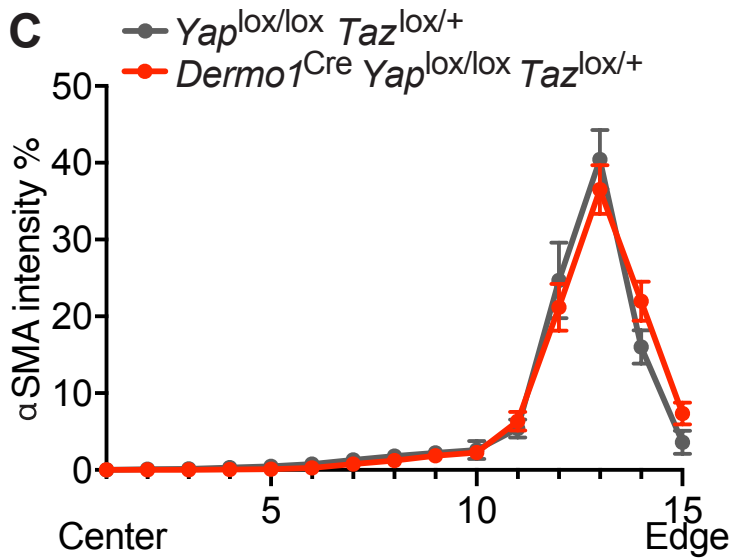

**Supplementary Figure 12. Deletion of YAP in the mesenchyme does not affect whole-body size or development of the circumferential smooth muscle at E13.5. Related to Figure 5.**

- (A) Photos of E13.5 *Dermo1<sup>Cre</sup> Yap<sup>lox/+</sup> Taz<sup>lox/+</sup>* and *Dermo1<sup>Cre</sup> Yap<sup>lox/lox</sup> Taz<sup>lox/+</sup>* embryos. Arrowhead indicates hemorrhage in one of the *Dermo1<sup>Cre</sup> Yap<sup>lox/lox</sup> Taz<sup>lox/+</sup>* embryos. Scale bar, 1 mm.
- (B) Higher magnifications of boxed regions from Figure 5F of E13.5 *Yap<sup>lox/lox</sup> Taz<sup>lox/+</sup>* and *Dermo1<sup>Cre</sup> Yap<sup>lox/lox</sup> Taz<sup>lox/+</sup>* intestines immunofluorescently stained for YAP (red), smooth muscle ( $\alpha$ SMA, green) and nuclei (Hoechst, blue). Scale bar, 25  $\mu$ m.
- (C) The radial distribution of  $\alpha$ SMA relative staining intensity from the center of the section to the outer section edge of E13.5 *Yap<sup>lox/lox</sup> Taz<sup>lox/+</sup>* (n=3) and *Dermo1<sup>Cre</sup> Yap<sup>lox/lox</sup> Taz<sup>lox/+</sup>* (n=3) intestines, subdivided into 15 ring bins. Values are presented as means  $\pm$  SD.



**Supplementary Table 1. Primer used in this study.**

| <b>Genotyping</b>       |                                  |
|-------------------------|----------------------------------|
| Dermo1-Cre_Common       | AACTTCCTCTCCCGGAGACC             |
| Dermo1-Cre_WT_R         | TGCCTCTCCAGCTCTTCCTC             |
| Dermo1-Cre_Mut_R        | CCGGTTATTCAACTTGCACC             |
| Mm_Cilk_GT_1F           | TCTTGGCAGCACCAGTGTAG             |
| Mm_Cilk_ex5_stop_R      | GTGGGAAAGGGTTCGAAGTT             |
| Mm_Cilk_Bln5R3          | TTTGTACAAGAAAGCTGGGTCT           |
| Mm_Cilk_WT_In5-6R_2     | CCAAAACCAAAACCAAAACC             |
| Inpp5e_ex7_F            | GACTTCAACTTCCGCCTGAG             |
| Inpp5e_intro7-8_R       | CCTGCAACACAGGAGAGTCA             |
| Inpp5e_intro5-6_F       | TTCTGGTTTTGTCCCCTAGC             |
| Inpp5e_ex9_R            | TACACAGGACGGTGGTCTGA             |
| Mm_Tctn3_GT_In3-4F      | ACAACCTGGCTGTGGCTCTCT            |
| Mm_Tctn3_GT_In3-4R      | CTTTCCTGCTCTGCATCTCC             |
| Mm_Tctn3_GT_Mln3-4F     | TCTGAGCTCATCTTCCTTCTCC           |
| Mm_Tctn3_GT_MR          | TTGTTGATATCGTGGTATCGTTATG        |
| Mm_tdTomato_GT_WT_F     | AAGGGAGCTGCAGTGGAGTA             |
| Mm_tdTomato_GT_WT_R     | CCGAAAATCTGTGGGAAGTC             |
| Mm_tdTomato_GT_Mut_F    | GGCATTAAAGCAGCGTATCC             |
| Mm_tdTomato_GT_Mut_R    | CTGTTCTGTACGGCATGG               |
| Mm_RosaDTA176_Mutant    | GCGAAGAGTTTGTCTCAACC             |
| Mm_RosaDTA176_Common    | AAAGTCGCTCTGAGTTGTTAT            |
| Mm_RosaDTA176_WT        | GGAGCGGGAGAAATGGATATG            |
| Mm_SmoGenoL             | GTTCCCAGGGTTGAAGACAG             |
| Mm_SmoGenoWtR           | ACAGCCAACCTCAGCAAAGC             |
| Mm_SmoGenoMutR          | CTAAAGCGCATGCTCCAGAC             |
| Mm_Yap-flox_F           | ACATGTAGGTCTGCATGCCAGAGGAGG      |
| Mm_Yap-flox_R           | AGGCTGAGACAGGAGGATCTCTGTGAG      |
| Mm_Taz-flox_F           | CCCACAGTTAAATGCTTCTCCCAAGACTGGG  |
| Mm_Taz-flox_R           | GGCTTGTGACAAAGAACCTGGGGCTATCTGAG |
| Mm_Myh11-cre-EGFP_GFP_F | AAGTTCATCTGCACCACCG              |
| Mm_Myh11-cre-EGFP_GFP_R | TCCTTGAAGAAGATGGTGCG             |
| Mm_B9d1_commonL         | CATTGTGGCTCACAACCATC             |
| Mm_B9d1_GT_In3-4F       | GTTGTCCAGCTTCCCATTGTAG           |
| Mm_B9d1_GT_In3-4R       | GAGCAGAAGGCTCAGAAGTGG            |
| Mm_B9d1_GT_Mln3-4R      | TGCAAGGACGCAGATTAGAA             |
| <b>qRTPCT</b>           |                                  |
| Mm_Cilk_F               | GGCATTTCATTCAAAACACG             |
| Mm_Cilk_R               | GATTTCTCGAGCCAATCCAA             |
| Mm_gapdh_F              | TGTTCTACCCCAATGTGT               |
| Mm_gapdh_R              | TGTGAGGGAGATGCTCAGTG             |
| Mm_Gli1_F               | GAATCGGACCCACTCCAATG             |
| Mm_Gli1_R               | GTGTTTTCGGAGCGAGCT               |
| Mm_Ptch1_F              | CTCCTGAAACCCAAAGCCAA             |
| Mm_Ptch1_R              | CGTCTCTCACTCGGGTGGTC             |
